# Supplementary material for: An enzyme–inorganic hybrid nanoflower based immobilized enzyme reactor with enhanced enzymatic activity
Source: Royal Society of Chemistry journal article supplement (doi:10.1039/c4tb01697a), 2015-01-01
Supplement: c4tb01697a1.pdf [file c4tb01697a1.pdf]

## Supporting information

for

### **Enzyme-inorganic hybrid nanoflowers based immobilized enzyme reactor with enhanced enzymatic activity**

**Yuqing Yin,<sup>a♀</sup> Yun Xiao,<sup>a♀</sup> Guo Lin,<sup>a</sup> Qi Xiao,<sup>a</sup> Zian Lin<sup>\*a,b</sup> and Zongwei Cai<sup>b</sup>**

a. Ministry of Education Key Laboratory of Analysis and Detection for Food Safety, College of Chemistry, Fuzhou University, Fuzhou, Fujian, 350116, China

b. Partner State Key Laboratory of Environmental and Biological Analysis, Department of Chemistry, Hong Kong Baptist University, 224 Waterloo Road, Kowloon Tong, Hong Kong, SAR, P. R. China

♀ The first two authors contributed equally to this paper

E-mail: zianlin@fzu.edu.cn (L.A.Lin);

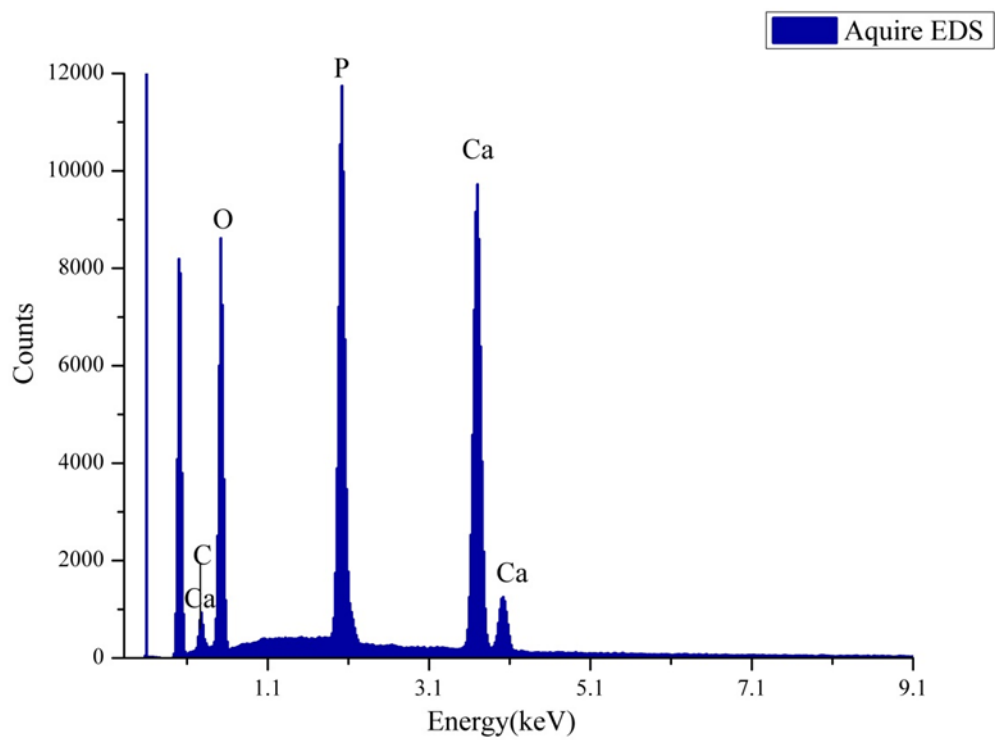

**Fig.S1** EDS pattern of the hybrid  $\text{Ca}_3(\text{PO}_4)_2 \cdot n\text{H}_2\text{O}$ - chymotrypsin nanoflowers

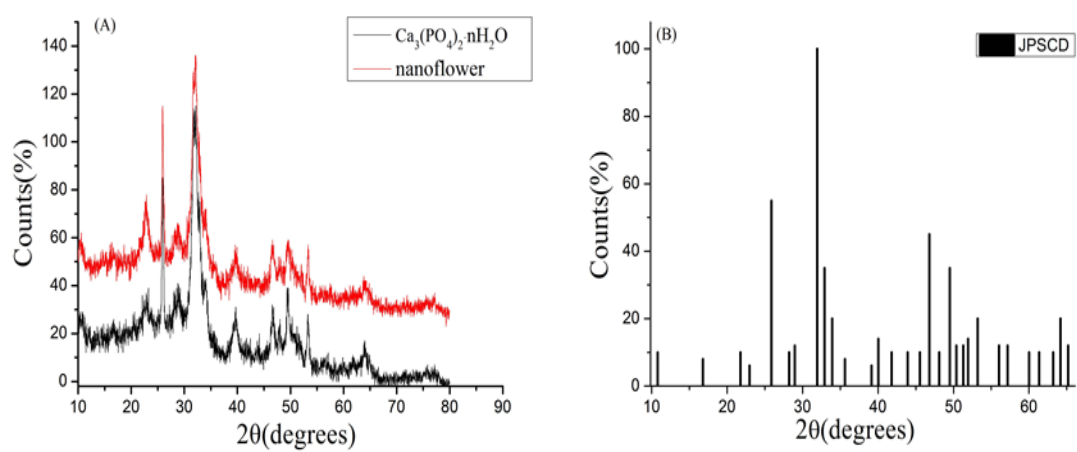

**Fig.S2** XRD patterns of (A) hybrid nanoflowers and  $\text{Ca}_3(\text{PO}_4)_2 \cdot n\text{H}_2\text{O}$ ; (B) peak of  $\text{Ca}_3(\text{PO}_4)_2 \cdot n\text{H}_2\text{O}$  (JCPDS 00-018-0303)

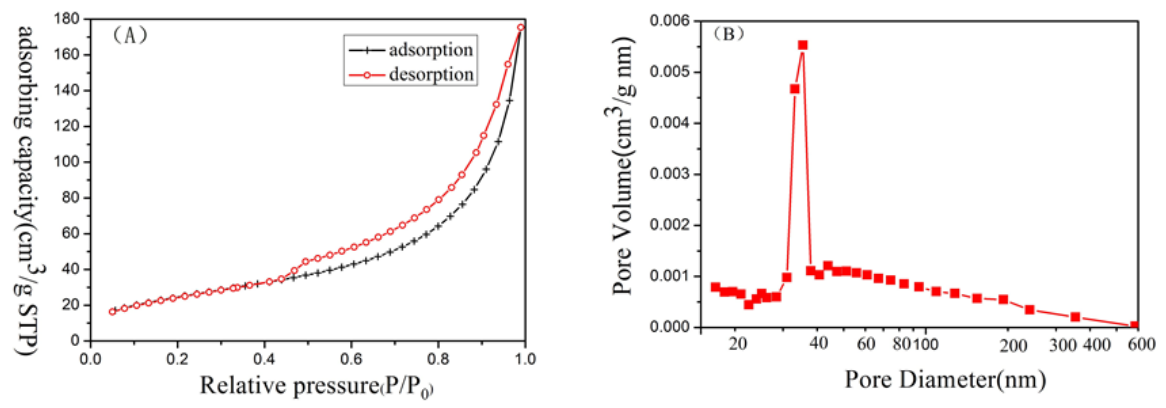

**Fig.S3** Adsorption of N<sub>2</sub> nanoflowers desorption isotherm (A) and the pore size distribution (B)

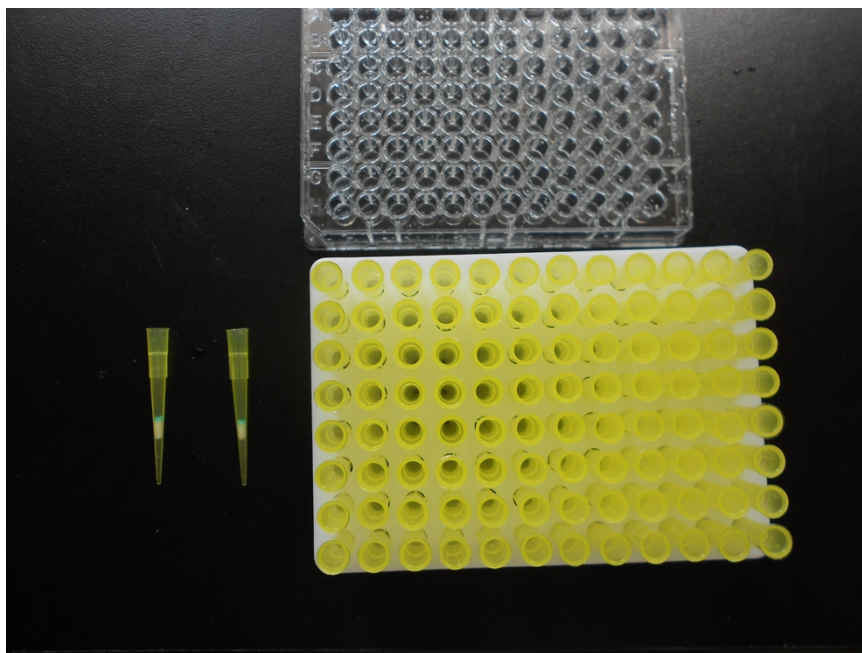

**Fig. S4.** Photograph of a home-made IMER devices

**Table S1.** The actual encapsulation yield ChT in the nanoflowers was further determined by UV/Vis methods).

| theoretical concentration (mg mL <sup>-1</sup> ) | Actual concentration (mg mL <sup>-1</sup> ) | Absorbance (253 nm) | The supernatant concentration (mg mL <sup>-1</sup> ) | The supernatant absorbance (253 nm) | The weight percentage (%) | Encapsulation yield (%) |
|--------------------------------------------------|---------------------------------------------|---------------------|------------------------------------------------------|-------------------------------------|---------------------------|-------------------------|
| 0.05                                             | 0.05059                                     | 0.098               | 0.01244                                              | 0.01862                             | 8.0292                    | 75.4101                 |
| 0.1                                              | 0.10007                                     | 0.181               | 0.07934                                              | 0.13801                             | 10.6986                   | 20.3125                 |
| 0.2                                              | 0.19644                                     | 0.332               | 0.16636                                              | 0.29330                             | 21.7391                   | 15.3124                 |
| 0.5                                              | 0.56844                                     | 0.904               | 0.49539                                              | 0.88047                             | 26.7442                   | 13.1728                 |
| 1.0                                              | 1.08409                                     | 1.786               | 1.00858                                              | 1.79628                             | 8.03                      | 7.01421                 |

(a) Regression equations:  $Y = 1.78455X - 0.00358$  ( $r = 0.9996$ ) (X: chymotrypsin concentration, Y: absorbance)

**Table S2.** Comparison of the proteolytic efficiency of chymotrypsin-immobilized nanoflower and free chymotrypsin for BSA digestion (for 12h incubation, BSA: SwissProt Accession: P02769)

|                      | Position | Mass     | Peptide sequence                 | Free                      | Nanoflower <sup>2</sup> | Nanoflower <sup>3</sup> |
|----------------------|----------|----------|----------------------------------|---------------------------|-------------------------|-------------------------|
|                      |          |          |                                  | chymotrypsin <sup>1</sup> |                         |                         |
| Incubation time      |          |          |                                  | 12h                       | 2min                    | 2min                    |
| Matched peptides     |          |          |                                  | 36                        | 39                      | 32                      |
| Sequence coverage, % |          |          |                                  | 41                        | 48                      | 43                      |
| 1                    | 1-12     | 1340.671 | (-)DTHKSEIAHRF(K)                | ✓                         | ✓                       | ✓                       |
| 2                    | 12-19    | 974.458  | (F)KDLGEEHF(K)                   | ✓                         | ✓                       | ✓                       |
| 3                    | 12-22    | 1272.658 | (F)KDLGEEHFKGL(V)                | ✓                         | *                       | ✓                       |
| 4                    | 27-36    | 1171.509 | (F)SQYLQQCPF(D)                  | ✓                         | ✓                       | ✓                       |
| 5                    | 31-36    | 793.355  | (Y)LQQCPF(D)                     | ✓                         | ✓                       | ✓                       |
| 6                    | 31-42    | 1514.731 | (Y)LQQCPFDEHVKL(V)               | *                         | *                       | ✓                       |
| 7                    | 32-42    | 1401.647 | (L)QQCPFDEHVKL(V)                | *                         | ✓                       | ✓                       |
| 8                    | 37-42    | 740.394  | (F)DEHVKL(V)                     | ✓                         | ✓                       | ✓                       |
| 9                    | 37-49    | 1572.79  | (F)DEHVKLVNELTEF(A)              | *                         | ✓                       | *                       |
| 10                   | 43-49    | 851.414  | (L)VNELTEF(A)                    | *                         | ✓                       | ✓                       |
| 11                   | 71-80    | 1092.524 | (F)GDELCKVASL(R)                 | *                         | ✓                       | ✓                       |
| 12                   | 85-102   | 2277.804 | (Y)GDMADCCEKQEPERNECF(L)         | ✓                         | ✓                       | ✓                       |
| 13                   | 85-103   | 2390.888 | (Y)GDMADCCEKQEPERNECF(L)         | ✓                         | *                       | ✓                       |
| 14                   | 127-134  | 1051.557 | (F)KADEKKFW(G)                   | ✓                         | ✓                       | ✓                       |
| 15                   | 138-147  | 1317.706 | (Y)LYEIAARRHPY(F)                | *                         | ✓                       | *                       |
| 16                   | 139-147  | 1204.622 | (L)YEIAARRHPY(F)                 | *                         | ✓                       | ✓                       |
| 17                   | 156-160  | 658.319  | (Y)YANKY(N)                      | ✓                         | ✓                       | ✓                       |
| 18                   | 156-163  | 865.478  | (F)KADEKKF(W)                    | ✓                         | ✓                       | ✓                       |
| 19                   | 161-177  | 1988.767 | (Y)NGVFQECQAEDKGACL(L)           | ✓                         | *                       | ✓                       |
| 20                   | 198-205  | 1010.509 | (L)RCASIQKF(G)                   | *                         | ✓                       | *                       |
| 21                   | 198-213  | 1922.007 | (L)RCASIQKFGERALKAW(S)           | *                         | *                       | *                       |
| 22                   | 206-213  | 930.516  | (F)GERALKAW(S)                   | ✓                         | ✓                       | ✓                       |
| 23                   | 214-218  | 545.341  | (W)SVARL(S)                      | ✓                         | ✓                       | *                       |
| 24                   | 214-227  | 1607.89  | (W)SVARLSQKFPKAEF(V)             | *                         | *                       | *                       |
| 25                   | 219-227  | 1081.568 | (L)SQKFPKAEF(V)                  | ✓                         | *                       | *                       |
| 26                   | 251-259  | 1065.415 | (L)ECADDRADL(A)                  | ✓                         | *                       | *                       |
| 27                   | 263-274  | 1394.647 | (Y)ICDNQDTISSKL(K)               | ✓                         | ✓                       | ✓                       |
| 28                   | 283-309  | 2937.455 | (L)LEKSHCIAEVEKDAIPENLPPLTADF(A) | ✓                         | ✓                       | ✓                       |
| 29                   | 318-325  | 808.384  | (Y)QEAKDAF(L)                    | ✓                         | ✓                       | *                       |
| 30                   | 319-326  | 921.468  | (Y)QEAKDAFL(G)                   | *                         | ✓                       | *                       |
| 31                   | 319-329  | 1212.59  | (Y)QEAKDAFLGSF(L)                | ✓                         | ✓                       | ✓                       |
| 32                   | 334-345  | 1413.76  | (Y)SRRHPEYAVSVL(L)               | *                         | ✓                       | *                       |

|    |         |          |                            |   |   |   |
|----|---------|----------|----------------------------|---|---|---|
| 33 | 334-346 | 1526.844 | (Y)SRRHPEYAVSVLL(R)        | * | ✓ | ✓ |
| 34 | 347-352 | 779.441  | (L)RLAKEY(E)               | ✓ | ✓ | * |
| 35 | 353-369 | 2071.757 | (Y)EATLECCAKDDPHACY(S)     | ✓ | ✓ | ✓ |
| 36 | 374-386 | 1548.838 | (F)DKLKHLVDEPQNL(I)        | * | * | * |
| 37 | 377-386 | 1192.632 | (L)KHLVDEPQNL(I)           | * | * | * |
| 38 | 387-394 | 1053.467 | (L)IKQNCDQF(E)             | ✓ | ✓ | ✓ |
| 39 | 387-397 | 1423.689 | (L)IKQNCDQFEKL(G)          | ✓ | * | * |
| 40 | 387-400 | 1772.816 | (L)IKQNCDQFEKLGEY(G)       | ✓ | ✓ | ✓ |
| 41 | 401-406 | 649.33   | (Y)GFQNAL(I)               | * | ✓ | * |
| 42 | 401-410 | 1180.647 | (Y)GFQNALIVRY(T)           | ✓ | * | * |
| 43 | 403-410 | 976.557  | (F)QNALIVRY(T)             | * | * | * |
| 44 | 406-410 | 550.335  | (L)IVRY(T)                 | ✓ | ✓ | ✓ |
| 45 | 411-429 | 2097.203 | (Y)TRKVPQVSTPTLVEVSRL(G)   | * | * | * |
| 46 | 423-428 | 688.424  | (F)VEVTKL(V)               | * | ✓ | * |
| 47 | 455-459 | 628.414  | (L)ILNRL(C)                | ✓ | ✓ | ✓ |
| 48 | 455-462 | 1001.581 | (L)ILNRLCVL(H)             | ✓ | ✓ | * |
| 49 | 457-462 | 775.413  | (L)NRLCVL(H)               | ✓ | ✓ | ✓ |
| 50 | 481-496 | 1926.901 | (L)VNRRPCFSALTPDETY(V)     | ✓ | * | * |
| 51 | 488-496 | 996.452  | (F)SALTPDETY(V)            | ✓ | ✓ | ✓ |
| 52 | 502-506 | 651.335  | (F)DEKLF(T)                | ✓ | ✓ | ✓ |
| 53 | 533-550 | 2158.133 | (L)KHKPKATEEQLKTMENF(V)    | * | * | * |
| 54 | 533-552 | 2475.306 | (L)KHKPKATEEQLKTMENFVAF(V) | * | * | * |
| 55 | 544-550 | 868.423  | (L)KTMENF(V)               | * | * | * |
| 56 | 544-553 | 1185.597 | (L)KTMENFVAF(V)            | ✓ | * | * |
| 57 | 551-567 | 2008.797 | (F)VAFVDKCCAADDKEACF(A)    | ✓ | ✓ | ✓ |
| 58 | 554-567 | 1691.623 | (F)VDKCCAADDKEACF(A)       | ✓ | * | * |
| 59 | 568-603 | 1583.9   | (F)AVEGPKLVVSTQTALA(-)     | * | * | * |

<sup>1</sup>Free ChT with 12 h of digestion at 37°C.

<sup>2</sup>Nanoflowers within 2 min of digestion at 37°C.

<sup>3</sup>Nanoflowers were stored at -20°C for 30 days.



**Table S3.** Comparison of the proteolytic efficiency of chymotrypsin-immobilized nanoflower and free chymotrypsin for HSA digestion (for 12h incubation, HSA: SwissProt Accession: P02768)

|    | Position             | Mass     | Peptide sequence             | Free chymotrypsin <sup>1</sup> | Nanoflower <sup>2</sup> |
|----|----------------------|----------|------------------------------|--------------------------------|-------------------------|
|    | Incubation time      |          |                              | 12h                            | 2min                    |
|    | Matched peptides     |          |                              | 27                             | 33                      |
|    | Sequence coverage, % |          |                              | 32                             | 34                      |
| 1  | 36-43                | 951.442  | (F)KDLGEEHF(K)               | *                              | ✓                       |
| 2  | 55-60                | 793.355  | (Y)LQQCPF(E)                 | ✓                              | ✓                       |
| 3  | 61-66                | 740.394  | (F)EDHVKL(V)                 | ✓                              | *                       |
| 4  | 74-90                | 1899.795 | (F)AKTCVADESAENCDKSL(H)      | ✓                              | ✓                       |
| 5  | 74-94                | 2398.054 | (F)AKTCVADESAENCDKSLHTLF(G)  | ✓                              | ✓                       |
| 6  | 105-126              | 2783.069 | (L)RETYGEMADCCAKQEPERNECF(L) | ✓                              | *                       |
| 7  | 109-126              | 2233.814 | (Y)GEMADCCAKQEPERNECF(L)     | *                              | ✓                       |
| 8  | 152-159              | 1004.432 | (F)HDNEETFL(K)               | ✓                              | ✓                       |
| 9  | 159-162              | 551.355  | (F)LKKY(L)                   | *                              | ✓                       |
| 10 | 164-174              | 1514.731 | (Y)LQQCPFEDHVKL(V)           | ✓                              | ✓                       |
| 11 | 239-243              | 529.346  | (W)AVARL(S)                  | ✓                              | ✓                       |
| 12 | 244-252              | 1109.574 | (L)SQRFPKAEF(A)              | ✓                              | *                       |
| 13 | 253-258              | 646.377  | (F)AEVSKL(V)                 | ✓                              | ✓                       |
| 14 | 288-299              | 1394.647 | (Y)ICENQDSISSKL(K)           | ✓                              | ✓                       |
| 15 | 344-350              | 779.393  | (Y)AEAKDVF(L)                | ✓                              | ✓                       |
| 16 | 344-351              | 892.477  | (Y)AEAKDVF(L)                | ✓                              | ✓                       |
| 17 | 378-394              | 2057.777 | (Y)ETTLKCCAAADPHECY(A)       | ✓                              | ✓                       |
| 18 | 395-401              | 855.425  | (Y)AKVFDEF(K)                | *                              | ✓                       |
| 19 | 395-404              | 1193.657 | (Y)AKVFDEFKPL(V)             | ✓                              | ✓                       |
| 20 | 399-404              | 748.388  | (F)DEFKPL(V)                 | ✓                              | ✓                       |
| 21 | 399-411              | 1557.780 | (F)DEFKPLVEEPQNL(I)          | ✓                              | ✓                       |
| 22 | 402-411              | 1166.642 | (F)KPLVEEPQNL(I)             | *                              | ✓                       |
| 23 | 405-411              | 828.410  | (L)VEEPQNL(I)                | *                              | ✓                       |
| 24 | 412-419              | 1052.508 | (L)IKQNCEL(E)                | ✓                              | ✓                       |
| 25 | 412-422              | 1422.693 | (L)IKQNCELFEQL(G)            | ✓                              | ✓                       |
| 26 | 432-435              | 550.335  | (L)LVRY(T)                   | ✓                              | *                       |
| 27 | 506-512              | 949.467  | (L)VNRPCF(S)                 | ✓                              | *                       |
| 28 | 506-521              | 1956.912 | (L)VNRPCFSALEVDETY(V)        | *                              | ✓                       |
| 29 | 513-521              | 1026.463 | (F)SALEVDETY(V)              | ✓                              | ✓                       |
| 30 | 513-526              | 1626.790 | (F)SALEVDETYVPKEF(N)         | ✓                              | ✓                       |
| 31 | 516-526              | 1355.637 | (L)EVDETYVPKEF(N)            | ✓                              | ✓                       |
| 32 | 522-526              | 619.345  | (Y)VPKEF(N)                  | ✓                              | ✓                       |
| 33 | 532-540              | 1078.487 | (F)TFHADICTL(S)              | ✓                              | ✓                       |
| 34 | 569-578              | 1114.524 | (L)KAVMDDFAAF(V)             | *                              | ✓                       |

|            |          |                             |   |   |
|------------|----------|-----------------------------|---|---|
| 35 579-592 | 1792.707 | (F)VEKCCKADDKETCF(A)        | ✓ | ✓ |
| 36 579-599 | 2548.125 | (F)VEKCCKADDKETCFAEEGKKL(V) | * | ✓ |
| 37 593-599 | 774.436  | (F)AEEGKKL(V)               | * | ✓ |

<sup>1</sup>Free ChT with 12 h of digestion at 37°C.

<sup>2</sup>Nanoflowers within 2 min of digestion at 37°C.

**Table S4.** Identification of proteins from human serum digested by ChT-embedded nanoflowers. (n=3)

| Group (#) | Distinct Peptides(#) | Distinct Summed MS/MS Search Score | % AA Coverage | Protein Name                                                                      |
|-----------|----------------------|------------------------------------|---------------|-----------------------------------------------------------------------------------|
| 1         | 5                    | 56.24                              | 19            | Ig alpha-1 chain C region                                                         |
| 1         | 3                    | 31.43                              | 16            | Ig alpha-2 chain C region                                                         |
| 2         | 4                    | 56.02                              | 38            | Ig lambda chain C regions                                                         |
| 3         | 2                    | 22.00                              | 6             | Immunoglobulin lambda-like polypeptide 1 precursor                                |
| 3         | 3                    | 55.52                              | 33            | Ig kappa chain C region                                                           |
| 4         | 4                    | 50.02                              | 21            | Alpha-1B-glycoprotein precursor                                                   |
| 5         | 3                    | 39.11                              | 6             | Haptoglobin precursor [Contains: Haptoglobin alpha chain; Haptoglobin beta chain] |
| 6         | 3                    | 38.83                              | 6             | Serum albumin precursor                                                           |
| 7         | 3                    | 33.02                              | 14            | Beta-2-glycoprotein 1 precursor                                                   |
| 8         | 2                    | 26.40                              | 9             | Alpha-2-HS-glycoprotein precursor                                                 |
| 9         | 2                    | 23.29                              | 12            | Ig gamma-4 chain C region                                                         |

**Table S5.** Identification of proteins from human serum digested by free ChT. (n=3)

| Group (#) | Distinct Peptides(#) | Distinct Summed MS/MS Search Score | % Coverage | AA | Protein Name                                                                                                                                                                                                           |
|-----------|----------------------|------------------------------------|------------|----|------------------------------------------------------------------------------------------------------------------------------------------------------------------------------------------------------------------------|
| 1         | 10                   | 148.58                             | 16         |    | Serum albumin precursor                                                                                                                                                                                                |
| 2         | 4                    | 67.18                              | 2          |    | Complement C3 precursor [Contains: Complement C3 beta chain; Complement C3 alpha chain; C3a anaphylatoxin; Complement C3b alpha' chain; Complement C3c alpha' chain fragment 1; Complement C3dg fragment; Complemen... |
| 3         | 3                    | 49.56                              | 2          |    | Alpha-2-macroglobulin precursor                                                                                                                                                                                        |
| 4         | 4                    | 48.39                              | 4          |    | Serotransferrin precursor                                                                                                                                                                                              |
| 5         | 4                    | 48.03                              | 14         |    | Ig gamma-2 chain C region                                                                                                                                                                                              |
| 5         | 3                    | 37.85                              | 9          |    | Ig gamma-1 chain C region                                                                                                                                                                                              |
| 5         | 3                    | 37.85                              | 9          |    | Ig gamma-4 chain C region                                                                                                                                                                                              |
| 6         | 1                    | 25.13                              | 4          |    | Ig mu chain C region                                                                                                                                                                                                   |
| 7         | 2                    | 24.73                              | 30         |    | Ig kappa chain C region                                                                                                                                                                                                |
| 8         | 2                    | 21.89                              | 4          |    | Haptoglobin precursor [Contains: Haptoglobin alpha chain; Haptoglobin beta chain]                                                                                                                                      |
